# Supplementary material
Source: PubMed Central journal article supplement (PMC1199559)
Supplement: nar_33_15_4965__1.pdf [file nar_33_15_4965__1.pdf]

| <b>Word #</b> | <b>S1 Braich</b> | <b>S1 Shortreed</b> |
|---------------|------------------|---------------------|
| W1            | TTACACCAATCTCTT  | CACATCACCAATATA     |
| W2            | ATTTCCAACATACTC  | TCCTCCAATTAATTA     |
| W3            | TCATCCTCTAACATA  | TCAATCTTTTTCAAT     |
| W4            | TCACTCCACTTAACT  | TATCTTTCCAATCTA     |
| W5            | ATAACCACAAACTCA  | TCATTCTTCTCTTAT     |
| W6            | CTATCCAATAACCTC  | ACTACAATCTCAATA     |
| W7            | TTCCACCCCAATAAA  | TCCTAACCAAAAATT     |
| W8            | CTATTTATATCCACC  | TTTACCTTTTCAAAT     |
| W9            | ACACCTAACTAAACT  | CAACTACATTTTCTA     |
| W10           | CTACCCTATTCTACT  | TCATCTTATCTCTCT     |
| W11           | ATCTTTAAATACCCC  | TCATTAAATCCATCT     |
| W12           | TCCATTTCTCCATAT  | CATAATACCTTCCTA     |
| W13           | TTTCTTCCATCACAT  | ACTACTTACATTTCA     |
| W14           | CATTCAATCCACTAC  | TCTTCAATCTACTTA     |
| W15           | AACAACCTTATCCTT  | TTTACCTCTCTAATC     |
| W16           | TCACTACATTACCTT  | ATCTCTTTTCTTTTC     |
| W17           | ACAAACCCTAACATT  | CTCTTTCACAAAAT      |
| W18           | TCTTACCATCTTCAT  | AACAAAACAACAAAT     |
| W19           | CTCTTCTCCTCTTTT  | ACAAAATCTCTTACA     |
| W20           | ACACAAATACACATC  | ACCATTTTTTCACTA     |
| W21           | CTCCTACAATTCCCTA | CTTAATTCTCTCACT     |
| W22           | AAACCTAATACTCCT  | CTCTCCTCAAATATT     |
| W23           | CCCTATTAATCAATC  | ATCATCCACATATTT     |
| W24           | TACTTATAACTTCCC  | TTCCACACTAAAATT     |
| W25           | TCTCAATACCACCTA  | ACCATCATTTATCTT     |
| W26           | TTCATACACTTACAC  | TCTCCTTATTCATTT     |
| W27           | AACTCATACTACTCA  | TACCATAACCAATTTT    |
| W28           | TATTCTCACCCATAA  | AAACCACCATAATTA     |
| W29           | ACACTATCAACATCA  | TCCTAATCCTCTTAA     |
| W30           | CCTTTACCTCAATAA  | TCCTACTCATAACTA     |
| W31           | CTCCCAAATAACATT  | CTCAACTTTCAAATT     |
| W32           | AACTTCACCCCTATA  | AACTTTACTATCCAT     |
| W33           | TCATATCAACTCCAC  | ATTCACCAAACTTTA     |
| W34           | ACCCAATCCTCTTAA  | TATACCATCTTTCAA     |
| W35           | TAATAACCCATCCTA  | TCCACTAATAAAACT     |
| W36           | TCATCAAACCTCACA  | CAATAATCCAACATT     |
| W37           | CTCAACAATTTTCCA  | CTCTAATTTCTTCCT     |
| W38           | AACACATTACTTCCT  | CACCTACATCAAATA     |
| W39           | ACCATTACTACCAT   | AACAAACCATAACTA     |
| W40           | CAACCAAACATAAAC  | TCTACCTATTCACTA     |

| <b>Word #</b> | <b>S2 Brenner</b> | <b>S2 Shortreed</b> |
|---------------|-------------------|---------------------|
| W1            | TTAC              | TTTC                |
| W2            | AATC              | CTTA                |

|    |      |      |
|----|------|------|
| W3 | TACT | CAAT |
| W4 | ATCA | CATA |
| W5 | ACAT | ATCT |
| W6 | TCTA | TTAC |
| W7 | CTTT | AAAC |
| W8 | CAAA | CTAC |

| <b>Word #</b> | <b>S4 Frutos</b> | <b>S4 Shortreed</b> |
|---------------|------------------|---------------------|
| W1            | AACCACCA         | TCCATCAT            |
| W2            | TAGCAGCT         | CACCTCAT            |
| W3            | TAGCTCGA         | ATCCACCT            |
| W4            | ATCGAGCT         | TCCACACT            |
| W5            | ATCGTCGA         | TACCACAA            |
| W6            | AAGGTGCA         | ATCACTCA            |
| W7            | AAGGACGT         | CTCTCAAC            |
| W8            | TTCCTGCA         | CAACTCAA            |
| W9            | TTCCACGT         | TTTCCTCA            |
| W10           | TACGTCCT         | TTTCTCCA            |
| W11           | TACGAGGA         | ACTCACCA            |
| W12           | ATGCTCCT         | ACACAAAC            |
| W13           | ATGCAGGA         | CTCATCAC            |
| W14           | TTGGACCA         | CAAACACA            |
| W15           | AACCTGGT         | ACCTACCA            |
| W16           | TTGGTGGT         | CACTCTTC            |
| W17           | ACCAAACC         | TTCCAAAC            |
| W18           | TCGAATCG         | TCCTCTTC            |
| W19           | TCGATAGC         | CAACACCA            |
| W20           | AGCTATCG         | CACTCCAT            |
| W21           | AGCTTAGC         | ATCCACTC            |
| W22           | ACGTTTCC         | TCCAACCT            |
| W23           | ACGTAAGG         | ACTCTCAC            |
| W24           | TGCATTCC         | CTTCCAAC            |
| W25           | TGCAAAGG         | CAATTCCA            |
| W26           | TCCTTACG         | CACAATCA            |
| W27           | TCCTATGC         | ATCCTCCT            |
| W28           | AGGATACG         | CAATCAAC            |
| W29           | AGGAATGC         | CACAACAA            |
| W30           | TGGTAACC         | AACCTTCA            |
| W31           | ACCATTGG         | CACTTTC             |
| W32           | TGGTTTGG         | CAATCTCA            |
| W33           | CCAACAAC         | ACTTACCA            |
| W34           | GCTACTAG         | CAACTTCT            |
| W35           | GCTAGATC         | ACACCTAC            |
| W36           | CGATCTAG         | CTTCACAT            |
| W37           | CGATGATC         | TCACACAC            |

|     |          |           |
|-----|----------|-----------|
| W38 | CCTTGTAC | CTCCTCAA  |
| W39 | CCTTCATG | TCTTTCCT  |
| W40 | GGAAGTAC | CAATCACT  |
| W41 | GGAACATG | CTCTCCAA  |
| W42 | GCATGAAG | CACTAACA  |
| W43 | GCATCTTC | ACATTCCA  |
| W44 | CGTAGAAG | CAACCAAA  |
| W45 | CGTACTTC | CATACACT  |
| W46 | GGTTCAAC | ACCAAAAC  |
| W47 | CCAAGTTG | CTCCTAAC  |
| W48 | GGTTGTTG | CACATCCA  |
| W49 | CAACCCAA | CTTCATCA  |
| W50 | GATCCGAT | ACATCTCT  |
| W51 | GATCGCTA | CACCATAC  |
| W52 | CTAGCGAT | TCCTACAC  |
| W53 | CTAGGCTA | TCACCAAT  |
| W54 | CATGGGAA | CAACTACA  |
| W55 | CATGCCTT | CTTTCTCA  |
| W56 | GTACGGAA | CACAATTC  |
| W57 | GTACCCTT | CAATCCAA  |
| W58 | GAAGGCAT | TCTTCCTT  |
| W59 | GAAGCGTA | CTCAAACCT |
| W60 | CTTCGCAT | CAAACCAC  |
| W61 | CTTCCGTA | CAACACAC  |
| W62 | GTTGCCAA | CTTTCACA  |
| W63 | CAACGGTT | ACTTCAAC  |
| W64 | GTTGGGTT | ATCACCAC  |
| W65 | ACACACAC | ACCATTCA  |
| W66 | TCTCAGAG | CAAACCTCA |
| W67 | TCTCTCTC | CACCTTTC  |
| W68 | AGAGAGAG | ACTCCACT  |
| W69 | AGAGTCTC | CATTTCCA  |
| W70 | ACTGTGAC | AACTTCA   |
| W71 | ACTGACTG | CACATACA  |
| W72 | TGACTGAC | CAAACAAC  |
| W73 | TGACACTG | CAACAAAC  |
| W74 | TCAGTCAG | TCCTCTCT  |
| W75 | TCAGAGTC | TCCAATCT  |
| W76 | AGTCTCAG | CTTAACCA  |
| W77 | AGTCAGTC | TCTACCAC  |
| W78 | TGTGACAC | TCTCACAC  |
| W79 | AACTGTG  | CATTACCA  |
| W80 | TGTGTGTG | CAACATCT  |
| W81 | AAAACCCC | ATCCTCAC  |
| W82 | TATACGCG | TCACTACA  |

|      |          |          |
|------|----------|----------|
| W83  | TATAGCGC | CTTTACCA |
| W84  | ATATCGCG | TCTCCAAC |
| W85  | ATATGCGC | CAAATCCT |
| W86  | AATTGGCC | CAAAACCT |
| W87  | AATTCCGG | CAACCTCT |
| W88  | TTAAGGCC | CACATTTC |
| W89  | TTAACCGG | CTTCCACA |
| W90  | TAATGCCG | CTTACACA |
| W91  | TAATCGGC | CAATACCA |
| W92  | ATTAGCCG | CTCCTTAC |
| W93  | ATTACGGC | CATCTTCA |
| W94  | TTTTCCCC | CATAACCA |
| W95  | AAAAGGGG | TTTCACCA |
| W96  | TTTTGGGG | TCACACCA |
| W97  | CACAACAC | CTTTTCCT |
| W98  | CTGATCTC | ACTTCTCA |
| W99  | CTGAAGAG | ACATTCAC |
| W100 | CTCTAGTC | CATTCTCA |
| W101 | GAGAAGTC | CATTCAAC |
| W102 | CAGTTGAC | CTTCTTCA |
| W103 | ACACCACA | CATCATCT |
| W104 | AGTCGAGA | CAACATTC |
| W105 | AGTCCTCT | CTCTACTC |
| W106 | AGAGCTGA | ACATCAAC |
| W107 | TCTCCTGA | CACAAAAC |
| W108 | ACTGGTCA | TCAACAAC |

| <b>Word #</b> | <b>S5 Penchovsky</b> | <b>S5 Shortreed</b> |
|---------------|----------------------|---------------------|
| W1            | CCATCACTACCTTCAT     | CAAATTCACCTCACTC    |
| W2            | TCCCTATTCACTCTCT     | ACCATCATCATCATCA    |
| W3            | ACTTCCCTTCTACACA     | CACCTACCTCCAAAAT    |
| W4            | TCTCTCAATCCACTTC     | TCCATCTCTTTCAACA    |
| W5            | TCTCTTCCTCTTACCA     | TCCTCAAACAAATCCA    |
| W6            | CTCATCTTAACCACCT     | TCCACAAAAATCTCCT    |
| W7            | TTCTACAACCTACCCT     | ACCACTATCTCTACCA    |
| W8            | ACCTTTACCCTATCCT     | TCACACTAATCAACCA    |
| W9            | CACCCATTCCCTAATAC    | TCAACCTTATCTCCTC    |
| W10           | ATTCTCACTCACAACC     | TCCTTTCAATCCACTT    |
| W11           | TCCTACTCTCCAATCA     | ACCATTATCCAATCCA    |
| W12           | ACACCATTTACCTAA      | ACATCATTCTTCTCCA    |
| W13           | TCCTCTATCATCCTCA     | CTTCCATCTTCTTCTCCT  |
| W14           | CACACCTCAACTTCTT     | ACCAACTCTCAAATCT    |
| W15           | CACCATCCTTATCTCA     | CTCTCCTCATTCATCA    |
| W16           | TACAATCCCACACTTT     | ACCACATTTCTCTCTT    |
| W17           | TCATACCTAACTCCCT     | TTCCTTCACCAAATA     |

|     |                   |                   |
|-----|-------------------|-------------------|
| W18 | ACCATTACTTCAACCA  | CTCCACCTTTTATCCT  |
| W19 | TCCAACCTAACACTCC  | TCCACATCACATAACT  |
| W20 | ACACCCTAACAAATCAA | CACCAATTTTTCCTCA  |
| W21 | TCCTACACAAACATCA  | TCCTAACTTTTCTCCTC |
| W22 | ACCACTCCAATAACTC  | TTCCAAACATCTACCA  |
| W23 | TCTTTCACACATCCAT  | TCCAACCTAAACCAAAC |
| W24 | ACACTAATCCTCCAAC  | ACCTTCATTCTAACCA  |

| <b>Word #</b> | <b>S7 Tulpan</b> | <b>S7 Shortreed</b> |
|---------------|------------------|---------------------|
| W1            | TACTCATCCAAC     | CACCATCTACAT        |
| W2            | TATTACCACCAC     | TTCATACCTCAC        |
| W3            | TAACTCTCCTCA     | TTTCTTTCACCA        |
| W4            | TAATCTCCACAC     | TCACAATTCCAA        |
| W5            | TACTCCTTACCA     | ACCAATTCTCTC        |
| W6            | TCCTTCTCACTA     | CTCTTCACTACA        |
| W7            | TATTCTCACCAC     | ACCACTAAACAA        |
| W8            | TACCTCACAATC     | TTCACATTTCCT        |
| W9            | TAAACACCAACA     | TTCCTTCTCTTC        |
| W10           | TACAAAACACCA     | ACACATTTTCAC        |
| W11           | TCCTAACACCTA     | TCCACAAATCAA        |
| W12           | TAACTCCTACCA     | CACCTACATCTT        |
| W13           | TATCCTCCTCAA     | TCCTATCTCACT        |
| W14           | TACCAACACTAC     | CAACACTTTCAA        |
| W15           | TCTCATCTCCTA     | TCCTATACCACA        |
| W16           | TAACAACCAACA     | CAATCCACATTC        |
| W17           | TACCTCCACATA     | AACACCTCAATT        |
| W18           | TACTCATTCCAC     | AAAACCTCCTTT        |
| W19           | TATACACACCAC     | AACCACTTTCAT        |
| W20           | TACCACAAACAA     | CACCAAAATCAA        |
| W21           | TAACCTACTCCA     | CACCTTTATCCT        |
| W22           | CTCCAAACCTTA     | CACCATATTCCT        |
| W23           | CACTTCACCTTA     | CAACCATTTCCTA       |
| W24           | TAACACCAAACA     | CACAACATTTCA        |
| W25           | TAACAACAACCA     | CACCAAATTTCA        |
| W26           | TAACCAACAACA     | ACCAATTCCATT        |
| W27           | TACACTACACAC     | ACCTTTTCATCA        |
| W28           | CATTCCAACCTA     | CAAACCTTCCTA        |
| W29           | TATCCTTCACAC     | AACCAACATCAT        |
| W30           | TACACTTCCATC     | CACTCAATACCT        |
| W31           | TACAATCCACTC     | ACCTTTTCTCA         |
| W32           | CTCCAACCAATA     | CACTCATCTCTT        |
| W33           | TCCACACCTATA     | ACACCATTTCATT       |
| W34           | TAACCTCCTACA     | CTCCTTCTCATT        |
| W35           | TAACATCACCTC     | ACAATCTCACAT        |
| W36           | TACTTCTCTCCA     | CTCCATAACCTT        |

|     |               |              |
|-----|---------------|--------------|
| W37 | CAACTCCAATA   | ACCAAATTCCT  |
| W38 | TACACAATCTC   | CTCCAAATACCT |
| W39 | TACTAACCACAC  | ACACCATAAACA |
| W40 | TACAACATCCTC  | ACAAAATCTCCA |
| W41 | TAACACTACCAC  | ACACACTAACAT |
| W42 | TACCATCCTACA  | AACCATCATCAA |
| W43 | TATTCCTCACAC  | AACTCAATCCTC |
| W44 | TCCTCACTACTA  | ACACAAATCCTT |
| W45 | TAACACATCCTC  | CTCCATACATCA |
| W46 | CATTCCACCTTA  | ACAATCTACTC  |
| W47 | TACACCAATCTC  | ACTCTATCACCT |
| W48 | TACCTCATCAAC  | ACAATCCATCAA |
| W49 | TCCATCTTCCTA  | ACCATACAAACA |
| W50 | CTCCTCTACCTA  | ACTTACTCCTCT |
| W51 | TACACCTACAAC  | AACCATTTACCA |
| W52 | TACTTCTCCTCA  | ATCATCCAAACA |
| W53 | TACAAACAACCA  | ACACAATAACCA |
| W54 | TATCACCACATC  | ACCTATCTACCA |
| W55 | TACCACTCATTC  | AACAATCACCAT |
| W56 | TCCTTCCTTCTA  | ACTATACCTCCA |
| W57 | CACCTCAAATA   | ACTAACCTTCAC |
| W58 | TAATCCATCCAC  | AACCAATCACAT |
| W59 | TCCTCCAATCTA  | ACCATAACAACA |
| W60 | TACACACTTCTC  | ACCAATACAACA |
| W61 | TCTCACCTCTTA  | ACACACTTCTTT |
| W62 | TACTCCACCATA  | ACCATACTCTCT |
| W63 | TAACCTCACACTC | ACAATCTCTCTC |
| W64 | TATCCACATCAC  | ACCAATAACACA |

| <b>Word #</b> | <b>S8 Tulpan</b> | <b>S8 Shortreed</b> |
|---------------|------------------|---------------------|
| W1            | CAACATCCTACTTTTT | ACTCACAAATTATCTC    |
| W2            | TCTTTCTATTCCTCAA | TCTCTCTTAAATCACA    |
| W3            | TACAAAACTCACTTT  | ACATCAATCTCTAAAC    |
| W4            | CTTCTTTCTACAAACA | ACATTCCTAAAAACAA    |
| W5            | CTCTCTTAAACTACCT | ACTAATCTTTCCAAAC    |
| W6            | TCACACAAACTAAAAA | TTTTTTCTCTCTACAC    |
| W7            | CTTACAATCCTAACAC | ATTTTCTTCTTTTCCA    |
| W8            | CTTCTCCTAATACCTT | CACAAAATCTTCTTCT    |
| W9            | CTATCCACAATACTTC | ACCATTAATTTCCATC    |
| W10           | TCTCAACTCATTTTTT | TTATTAATCCTCACCA    |
| W11           | TCTATCATCCTTTCAA | CTCTCCATCAAATATC    |
| W12           | ACATCCATTAACAATC | ACCTAATCACCTAAAT    |
| W13           | CACTTCCTTCTAATA  | ACATTCATTCAATTCA    |
| W14           | CTCAAAACTAACCATT | AACTACTTATTCCTCA    |
| W15           | CTCAATCTTTTCTTCA | CAATATATCCTTCCAC    |

|     |                   |                   |
|-----|-------------------|-------------------|
| W16 | TATTCACATTACCAAC  | CTTTTTAACTTCCTCA  |
| W17 | CACAATTACCATACAA  | TCTCTTCTCCAATTAA  |
| W18 | TACTCTTCTCACATAA  | ACCTAATACTTCATCA  |
| W19 | CACTTTCAAACACTT   | TCACACATCAAAATTA  |
| W20 | CTTCAATATCTACCAC  | CACACCTTCTTATATC  |
| W21 | CTAACTCAAACACAAT  | ACCTATTTTTTACCAC  |
| W22 | TTCACATACTTATCCA  | TTCCTTTTATCCTTTC  |
| W23 | TACTACTTACAACCAT  | TTCTTTCTCATATCCA  |
| W24 | TCTTTACCTCAACATA  | TCTTATCATCTACCTC  |
| W25 | CTATCAACTCCATCTA  | TCCAACATCCTAATAT  |
| W26 | AATATCCTACCAACAT  | CTACAATCACTTCTAC  |
| W27 | CAATAATTCATCACCT  | ACCTATTATTCAACAC  |
| W28 | ACTCTCTAATAACCTC  | CAACCAATCATAAAAC  |
| W29 | ATCTAACACTACCAAT  | ACCTACACTTAATACT  |
| W30 | CTTTCCTACTAAACAC  | TTCTTACTAACCATCA  |
| W31 | TCTTTAATTCTTCCAC  | ACACCATAATTCCCTAT |
| W32 | CTCCTATTCTCCTTAA  | TTCAAACCTCAATCAAT |
| W33 | CTAACATACACTCATC  | TCAATTTTCCATTCTT  |
| W34 | TCACAACACTAACTA   | ACCATTTTCATATCTCT |
| W35 | TCTCTTCAATACAAAC  | CTTTCCTCCTATAAAC  |
| W36 | ATATACCAATACACCA  | CAAAAATACATCACCT  |
| W37 | TCTACTACATCAAACA  | AACTCATACTTTTCAC  |
| W38 | TCTTTACTACATTCTT  | TACCTCTCTATTTCAA  |
| W39 | TATCTTCACCACTTTA  | ACCAAACCTAACATATC |
| W40 | TTACTCATTCACTACA  | AACATTCTACATCAAC  |
| W41 | TCCATTTAACATCTTC  | ACAACCTAAAACATTCA |
| W42 | CAACACCATAACATTA  | ACCTTAAAATAACCAC  |
| W43 | CAAACAAATCAACTTC  | CTCAATAACCTCATT   |
| W44 | ACCTTCTCATAACTTA  | CAACATTACTCTACTC  |
| W45 | TCACACATATCTCATA  | ACCATACAATAAACAC  |
| W46 | TACTTCTTCTTCATCA  | AACACTAATAACACAC  |
| W47 | ACTCTACATTACTCTC  | TATTACCTCTTCCAAA  |
| W48 | TCAACTTATCTTCTCT  | ACAATACCTACAAATC  |
| W49 | TCATCTAATCACTCTT  | CACTCATCTAACAAT   |
| W50 | CAATTCAATCTACACT  | TCTATACTCACTTTCA  |
| W51 | TCATAAACCTATCACT  | CACTACATTTTCTCAA  |
| W52 | CACCAATCAAATAAAC  | CACACTATCCTTAAAC  |
| W53 | CTTTATCTCTCCTACA  | TCTTTATTCTCCTTCA  |
| W54 | ACCTACACAATAACTA  | TCTTCCATATTAACCA  |
| W55 | TCACACTTCTTACTAT  | CACAAAAAAAAAAACCA |
| W56 | CTCACTTCATAATCTC  | CACTCCACATAATTTT  |
| W57 | TATCCTCTAAAACCTCA | ACCTTCAACTACTATT  |
| W58 | CTCTAACTAACTCCTT  | CAAACAATCCTATTCA  |
| W59 | ACCAATTTCAATTCATT | ACCTTCATTTTAAACA  |
| W60 | TTACCACACCTTATTA  | ACAATTATCAACTCTC  |

|     |                  |                   |
|-----|------------------|-------------------|
| W61 | ACTTTTCATCAAATCA | CTCCAACCTTCTTATC  |
| W62 | ATCCTCAATAACAAAC | CATACAACCTCCATTTT |
| W63 | TATACTTTCCTCCAAA | TACCATTTACCTAACA  |
| W64 | AACACTCTCATCTAAT | CAAAAATTTTTCCACA  |
